# Supplementary material for: Notch3-Mediated mTOR Signaling Pathway Is Involved in High Glucose-Induced Autophagy in Bovine Kidney Epithelial Cells
Source: MDPI journal article supplement (doi:10.3390/molecules27103121), 2022-05-13
Supplement: s1 [file s1]

Article

# Notch3-Mediated mTOR Signaling Pathway Is Involved in High Glucose-Induced Autophagy in Bovine Kidney Epithelial Cells

Yaocheng Cui <sup>1,†</sup>, Jing Fang <sup>1,†</sup>, Hongrui Guo <sup>1</sup>, Hengmin Cui <sup>1</sup>, Junliang Deng <sup>1</sup>, Shumin Yu <sup>1</sup>, Liping Gou <sup>1</sup>, Fengyuan Wang <sup>2</sup>, Xiaoping Ma <sup>1</sup>, Zhihua Ren <sup>1</sup>, Yue Xie <sup>1</sup>, Yi Geng <sup>1</sup>, Ya Wang <sup>1</sup> and Zhicai Zuo <sup>1,\*</sup>

<sup>1</sup> Key Laboratory of Animal Disease and Human Health of Sichuan Province, College of Veterinary Medicine, Sichuan Agricultural University, Chengdu 611130, China; cuiyaocheng@stu.sicau.edu.cn (Y.C.); fangjing4109@163.com (J.F.); guohongrui@sicau.edu.cn (H.G.); cuihengmin2008@sina.com (H.C.); dengjl213@126.com (J.D.); yayushumin@163.com (S.Y.); glping0827@163.com (L.G.); mxp886@sina.com (X.M.); zhihua\_ren@126.com (Z.R.); zhandegaokandey123@163.com (Y.X.); gengyisicau@126.com (Y.G.); wangyayang@126.com (Y.W.)

<sup>2</sup> College of Animal & Veterinary Sciences, Southwest Minzu University, Chengdu 610041, China; wfy\_sccd@163.com

\* Correspondence: zzcjl@126.com; Tel.: +86-180-3064-8320

† These authors contributed equally to this work.

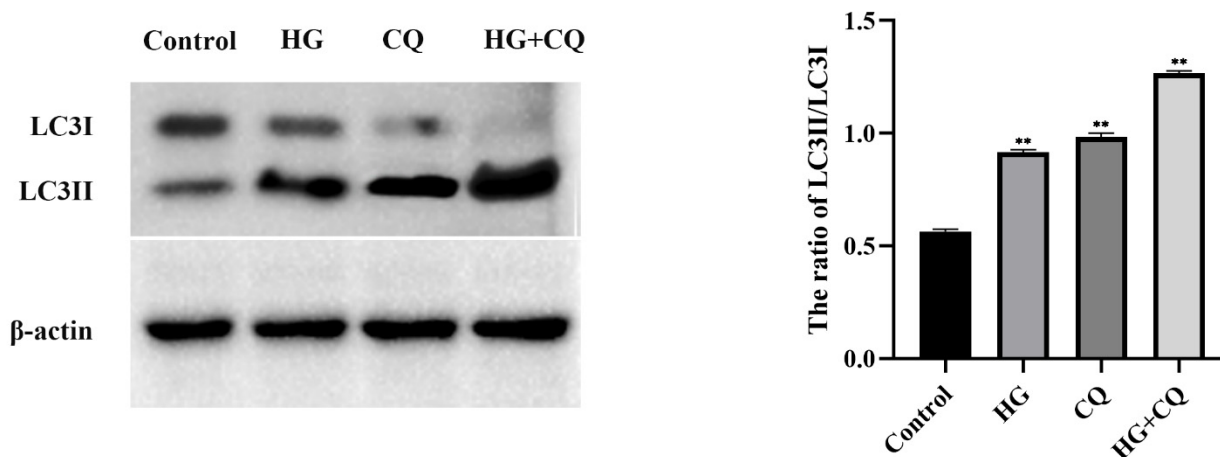

**Figure S1.** The effect of HG on autophagic flux. MDBK cells were pretreated with CQ (10  $\mu$ M) for 6h, and then stimulated with 25.5 mM glucose for another 24 h, and the protein expression level of LC3 was detected by the Western bolt. \*\*  $p < 0.01$  compared with control group.
